# Supplementary material for: Hass avocado ripeness classification by mobile devices using digital image processing and ANN methods
Source: publisher site journal article supplement (doi:10.1515/ijfe-2019-0161), 2020-09-28
Supplement: Supplementary file 1 [file j_ijfe-2019-0161_suppl.pdf]

24 August 2020

To whom it may concern,

**RE: Proof-Reading-Service.com Editorial Certification**

This is to confirm that the document described below has been submitted to Proof-Reading-Service.com for editing and proofreading.

We certify that the editor has corrected the document, ensured consistency of the spelling, grammar and punctuation, and checked the format of the sub-headings, bibliographical references, tables, figures etc. The editor has further checked that the document is formatted according to the style guide supplied by the author. If no style guide was supplied, the editor has corrected the references in accordance with the style that appeared to be prevalent in the document and imposed internal consistency, at least, on the format.

It is up to the author to accept, reject or respond to any changes, corrections, suggestions and recommendations made by the editor. This often involves the need to add or complete bibliographical references and respond to any comments made by the editor, in particular regarding clarification of the text or the need for further information or explanation.

We are one of the largest proofreading and editing services worldwide for research documents, covering all academic areas including Engineering, Medicine, Physical and Biological Sciences, Social Sciences, Economics, Law, Management and the Humanities. All our editors are native English speakers and educated at least to Master's degree level (many hold a PhD) with extensive university and scientific editorial experience.

**Document title:** Hass Avocado Ripeness Classification by Mobile Devices Using Digital Image Processing and ANN Methods

**Author(s):** César Augusto Jaramillo-Acevedo; William Enrique Choque-Valderrama; Gloria Edith Guerrero-Álvarez; Carlos Augusto Meneses Escobar

**Format:** American English

**Style guide:** International Journal of Food Engineering at  
<https://www.degruyter.com/view/journals/ijfe/ijfe-overview.xml>
